# Supplementary material for: Olfaction and topography, but not magnetic cues, control navigation in a pelagic seabird: displacements with shearwaters in the Mediterranean Sea
Source: PubMed Central journal article supplement (PMC4637929; doi:10.1038/srep16486), 2015-11-09
Supplement: srep16486-s1.pdf [file srep16486-s1.pdf]

Olfaction and topography, but not magnetic cues, control navigation in a pelagic seabird: displacements with shearwaters in the Mediterranean Sea

Enrica Pollonara, Paolo Luschi, Tim Guilford, Martin Wikelski, Francesco Bonadonna, Anna Gagliardo

Supplementary material

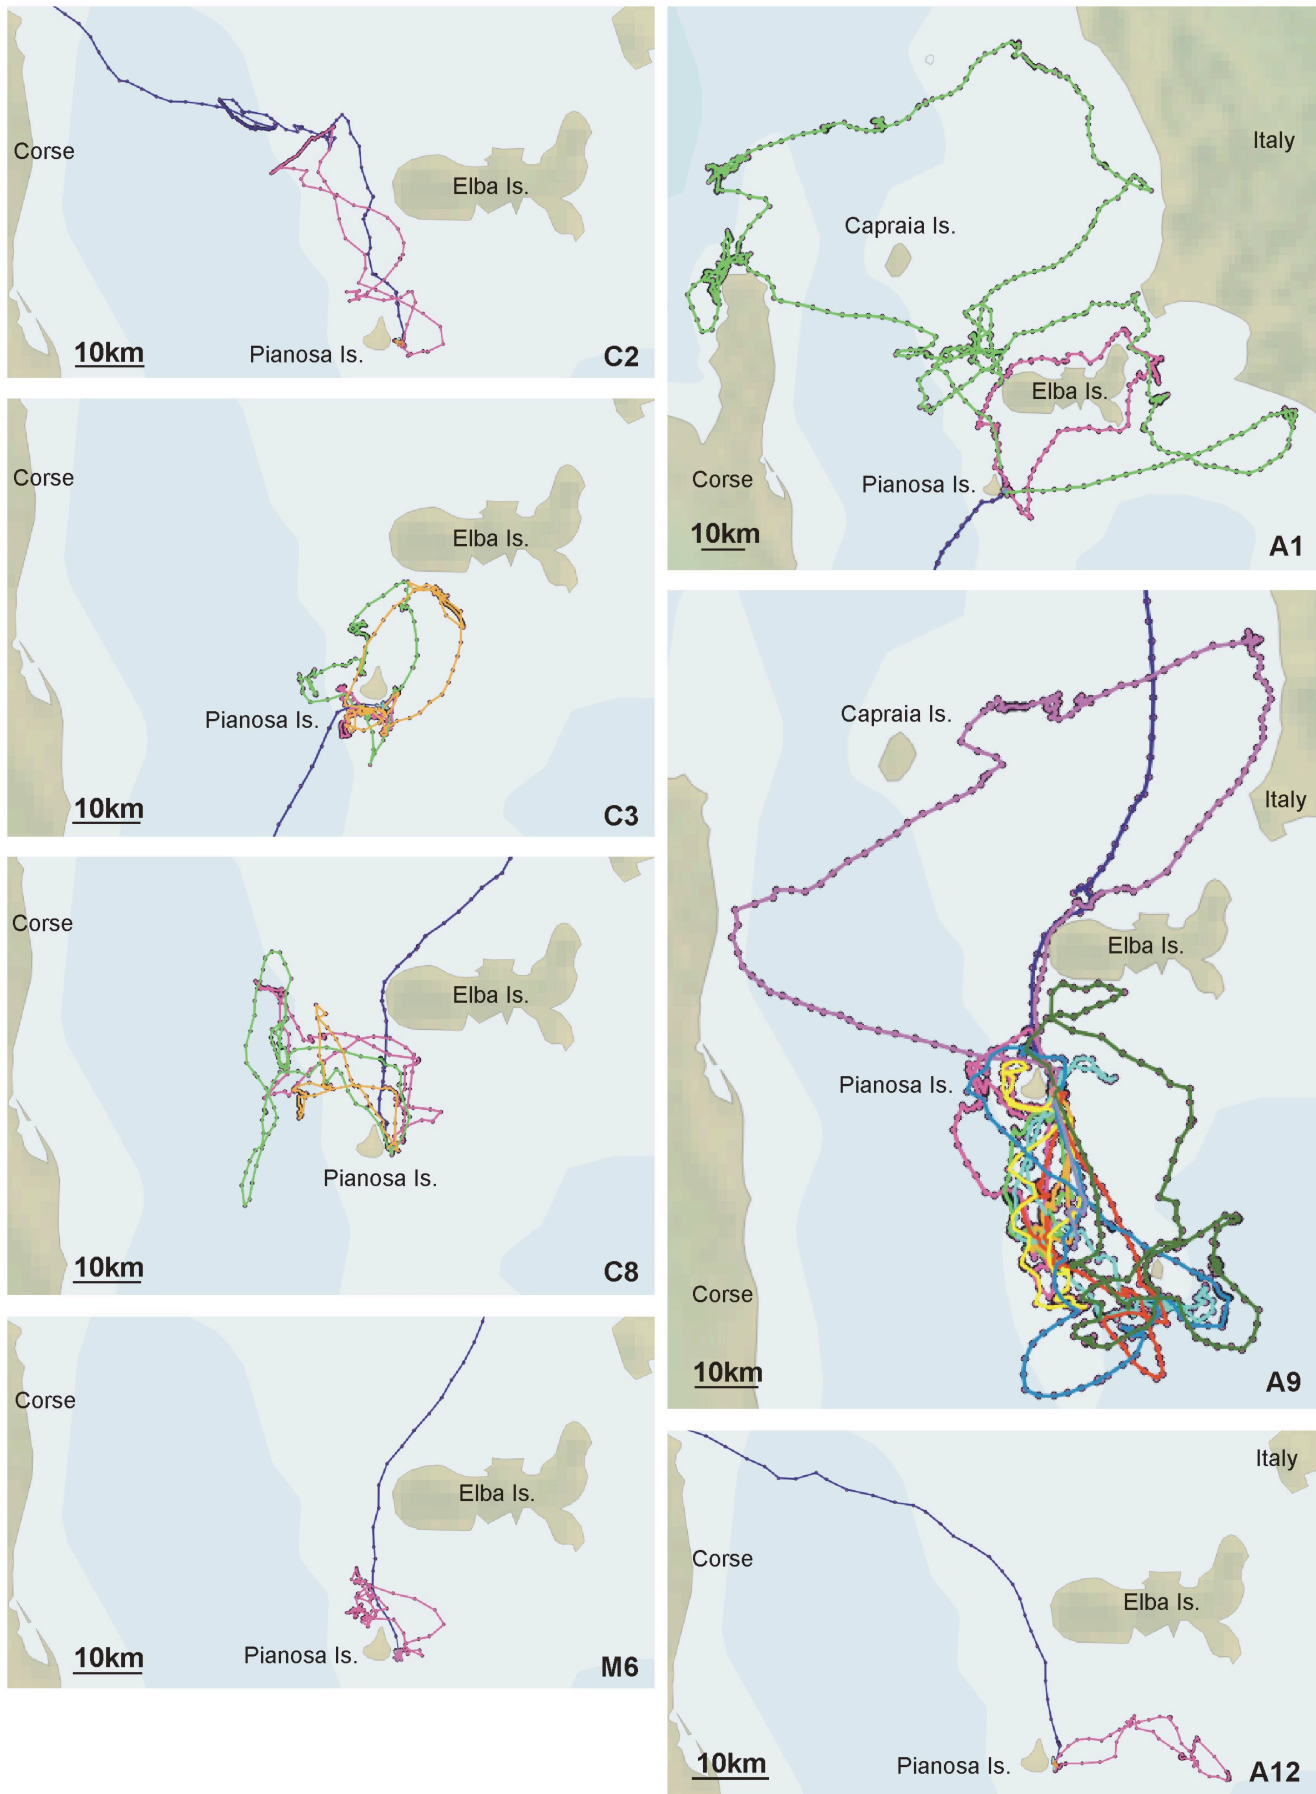

Figure S1. Spontaneous flights (see Supplementary Table S2 for the identification colour code), and the last part of the homing flight after displacement (dark blue line) are reported in the figure. The paths of the shearwaters are represented over a Natural Earth map (<http://www.naturalearthdata.com>). See main text and Supplementary Table S2 for other explanations.

Table S1

| Tr | Track | Ring   | Colony | SD | Release date/time   | Release location          | Tag | n  | MV length dir° | Home dist dir° | Homing       | Track analysis         |
|----|-------|--------|--------|----|---------------------|---------------------------|-----|----|----------------|----------------|--------------|------------------------|
| C  | C1    | TJ3787 | S      | 0  | 21/06/2012<br>11:41 | 5.034929 E<br>42.342415 N | GPS | 28 | 0.668<br>60°   | 416<br>86°     | 26/06/2012 h | c <sup>1,2,3,4,5</sup> |
|    | C2    | TJ3757 | S      | 0  | 21/06/2012<br>11:54 | 4.932396 E<br>42.308525 N | GPS | 53 | 0.473<br>80°   | 425<br>85°     | 22/06/2012 h | c <sup>1,2,3,4,5</sup> |
|    | C3    | TJ9179 | B      | 0  | 21/06/2012<br>12:15 | 4.803005 E<br>42.265091 N | GPS | 43 | 0.561<br>72°   | 435<br>85°     | 22/06/2012 h | c <sup>1,2,3,4,5</sup> |
|    | C4    | TH1324 | S      | 0  | 21/06/2012<br>12:38 | 4.62296 E<br>42.211235 N  | GPS | 23 | 0.947<br>84°   | 451<br>84°     | 25/06/2012 h | c <sup>1,2,3,4,5</sup> |
|    | C5    | TJ3758 | S      | 1  | 21/06/2012<br>12:44 | 4.574549 E<br>42.202847 N | GPS | 29 | 0.788<br>46°   | 455<br>84°     | 22/06/2012 h | c <sup>1,2,3,4,5</sup> |
|    | C6    | TH0429 | S      | 1  | 21/06/2012<br>13:00 | 4.474911 E<br>42.171799 N | GPS | 68 | 0.320<br>155°  | 464<br>84°     | 23/06/2012 h | c <sup>1,2,3,4,5</sup> |
|    | C7    | TA2200 | S      | 0  | 26/06/2012<br>10:38 | 4.816201 E<br>42.239261 N | GPS |    |                | 435<br>84°     | 28/07/2012 r | n                      |
|    | C8    | TK4887 | S      | 1  | 22/06/2014<br>11:50 | 5.093163 E<br>42.134893 N | GPS | 41 | 0.534<br>48°   | 414<br>82°     | 24/06/2014 h | c <sup>1,2,3,4,5</sup> |
|    | C9    | TK4890 | S      | 0  | 22/06/2014<br>11:18 | 5.304507 E<br>42.197574 N | GPS | 30 | 0.658<br>50°   | 396<br>83°     | 24/06/2014 h | c <sup>1,2,3,4,5</sup> |
| M  | M1    | TJ9189 | S      | 0  | 21/06/2012<br>11:51 | 4.987313 E<br>42.317825 N | GPS | 39 | 0.562<br>74°   | 420<br>86°     | 22/06/2012 h | c <sup>1,2,3,4,5</sup> |
|    | M2    | TA2195 | S      | 0  | 21/06/2012<br>12:11 | 4.834994 E<br>42.281216 N | GPS | 28 | 0.949<br>310°  | 433<br>85°     | 26/06/2012 r | i <sup>2</sup>         |
|    | M3    | TA2249 | S      | 1  | 21/06/2012<br>12:26 | 4.702586 E<br>42.241848 N | GPS | 37 | 0.613<br>81°   | 444<br>85°     | 22/06/2012 h | c <sup>1,2,3,4,5</sup> |
|    | M4    | TA2157 | S      | 0  | 21/06/2012<br>12:53 | 4.520641 E<br>42.180363 N | GPS | 37 | 0.707<br>352°  | 460<br>84°     | 22/06/2012 h | c <sup>1,2,3,4,5</sup> |
|    | M5    | TC8805 | S      | 1  | 26/06/2012<br>10:20 | 4.947409 E<br>42.285652 N | GPS | 30 | 0.598<br>90°   | 424<br>85°     | 06/07/2012 r | i <sup>1,2,3,4,5</sup> |
|    | M6    | TH0410 | S      | 0  | 26/06/2012<br>10:28 | 4.874951 E<br>42.259758 N | GPS | 24 | 0.778<br>78°   | 430<br>85°     | 27/06/2012 h | c <sup>1,2,3,4,5</sup> |
|    | M7    | TE9218 | S      | 1  | 26/06/2012<br>10:54 | 4.716255 E<br>42.197392 N | GPS | 20 | 0.980<br>57°   | 444<br>84°     | 27/06/2012 h | c <sup>1,2,3,4,5</sup> |
|    | M8    | TK4891 | S      | 0  | 22/06/2014<br>11:39 | 5.206323 E<br>42.168231 N | GPS | 24 | 0.715<br>50°   | 404<br>83°     | 25/06/2014 r | i <sup>1,2,3,4,5</sup> |
|    | M9    | TK4889 | S      | 0  | 22/06/2014<br>11:02 | 5.408251 E<br>42.227585 N | GPS | 29 | 0.897<br>40°   | 387<br>84°     | 24/06/2014 h | c <sup>1,2,3,4,5</sup> |
| A  | A1    | TH0433 | S      | 0  | 21/06/2012<br>12:04 | 4.896313 E<br>42.299709 N | GPS | 64 | 0.301<br>21°   | 428<br>85°     | 27/06/2012 h | c <sup>1,2,3,4,5</sup> |
|    | A2    | TH0435 | B      | 0  | 21/06/2012<br>12:19 | 4.745000 E<br>42.257000 N | GPS |    |                | 439<br>85°     | lost         | n                      |
|    | A3    | TA2242 | S      | 1  | 26/06/2012<br>10:22 | 4.915003 E<br>42.277896 N | PTT |    |                | 427<br>85°     | 06/07/2012 r | lo <sup>1</sup>        |
|    | A4    | TJ9188 | S      | 0  | 26/06/2012<br>10:33 | 4.844896 E<br>42.250435 N | PTT |    |                | 433<br>85°     | 28/07/2012 r | lo <sup>1</sup>        |
|    | A5    | TJ3777 | S      | 0  | 26/06/2012<br>10:43 | 4.78926 E<br>42.22625 N   | PTT |    |                | 438<br>84°     | 28/07/2012 r | lo <sup>1</sup>        |
|    | A6    | TA2240 | S      | 1  | 26/06/2012<br>10:48 | 4.746877 E<br>42.212343 N | PTT |    |                | 441<br>84°     | 21/07/2012 r | lo <sup>1</sup>        |
|    | A7    | TA2179 | S      | 1  | 26/06/2012<br>10:59 | 4.675004 E<br>42.185043 N | PTT |    |                | 447<br>84°     | 11/07/2012 r | lo <sup>1</sup>        |
|    | A8    | TC8831 | S      | 0  | 22/06/2014<br>11:38 | 5.173489 E<br>42.158507 N | GPS | 25 | 0.891<br>5°    | 407<br>83°     | 25/06/2014 h | c <sup>1,2,3,4,5</sup> |
|    | A9    | TH0438 | S      | 0  | 22/06/2014<br>11:10 | 5.385069 E<br>42.221226 N | GPS | 71 | 0.289<br>344°  | 389<br>83°     | 25/06/2014 h | c <sup>1,2,3,4,5</sup> |
|    | A10   | TH0423 | S      | 0  | 22/06/2014<br>11:22 | 5.273108 E<br>42.188067 N | GPS | 36 | 0.781<br>44°   | 399<br>83°     | 26/06/2014 h | c <sup>1,2,3,4,5</sup> |
|    | A11   | TJ3795 | S      | 1  | 22/06/2014<br>11:17 | 5.345146 E<br>42.209542 N | GPS | 29 | 0.774<br>360°  | 392<br>83°     | 02/07/2014 h | c <sup>1,2,3,4,5</sup> |
|    | A12   | TA2247 | S      | 0  | 22/06/2014<br>11:43 | 5.135368 E<br>42.147189 N | GPS | 23 | 0.929<br>360°  | 410<br>83°     | 05/07/2014 h | c <sup>1,2,3,4,5</sup> |
|    | A13   | TA2248 | S      | 0  | 22/06/2014<br>11:27 | 5.237152 E<br>42.177399 N | GPS |    |                | 402<br>83°     | lost         | n                      |
|    | A14   | TK4888 | S      | 1  | 22/06/2014<br>11:57 | 5.039333 E<br>42.119199 N | GPS |    |                | 419<br>82°     | lost         | n                      |

For each bird, treatment (Tr), track code (Track), ring number (Ring), breeding Colony (S, La Scola; B, Punta Brigantina), number of days between the incubation shift and the bird capture (SD), date and time of release, Longitude and Latitude (Location) of the release point are reported. In the Tag column the kind of logger used is specified. The following columns report details of mean vector calculations done for the section of the tracks up to 60 km from the release point: n, number of angles used to calculate the mean vectors; mv, mean vector length and direction; home distance (km) and direction ( $^{\circ}$ ) from the release point. Homing: date of bird homing or recapture (h or r, respectively); lost indicates that the bird never returned to their nest during the breeding period. Track analysis: availability of tracking data for analysis is indicated as follows; c: complete track from the release point to home; i: incomplete track; lo: low number of fixes; n: no track obtained. The parameters included in the analysis are indicated by the numbers as follows: <sup>1</sup>homing performances; <sup>2</sup>mean vector length in the first 60 km; <sup>3</sup>Efficiency Index relative to the section of track from the release point up to 10 km from home; <sup>4</sup>preference of the birds in travelling near the coast; <sup>5</sup>decision point.

Table S2

| Code       | Ring   | Release    | Homing              | GPS off                                                                             | Flight     | MD   | Length | Duration            | Track                                                                               |
|------------|--------|------------|---------------------|-------------------------------------------------------------------------------------|------------|------|--------|---------------------|-------------------------------------------------------------------------------------|
| C2         | TJ3757 | 21/06/2012 | 22/06/2012          | 24/06/2012                                                                          | 23/06/2012 | 31.2 | 121.7  | 18 <sup>h</sup> 32' |  |
| C3         | TJ9179 | 21/06/2012 | 22/06/2012          | 26/06/2012                                                                          | 24/06/2012 | 7.7  | 48.9   | 19 <sup>h</sup> 00' |  |
|            |        |            |                     |                                                                                     | 25/06/2012 | 17.5 | 108.1  | 18 <sup>h</sup> 09' |  |
|            |        |            |                     |                                                                                     | 26/06/2012 | 18.2 | 129.1  | 18 <sup>h</sup> 44' |  |
| C8         | TK4887 | 22/06/2014 | 24/06/2014          | 27/06/2014                                                                          | 25/06/2014 | 30.4 | 123.2  | 22 <sup>h</sup> 14' |  |
|            |        |            |                     |                                                                                     | 26/06/2014 | 32.5 | 160.4  | 19 <sup>h</sup> 06' |  |
|            |        |            |                     |                                                                                     | 27/06/2014 | 22.8 | 83.0   | 20 <sup>h</sup> 40' |  |
| M6         | TH0410 | 26/06/2012 | 27/06/2012          | 29/06/2012                                                                          | 28/06/2012 | 12.9 | 94.8   | 17 <sup>h</sup> 23' |  |
| A1         | TH0433 | 21/06/2012 | 27/06/2012          | 02/07/2012                                                                          | 27/06/2012 | 45.4 | 169.1  | 20 <sup>h</sup> 12' |  |
|            |        |            |                     |                                                                                     | 29/06/2012 | 98.5 | 855.0  | 91 <sup>h</sup> 48' |  |
| A9         | TH0438 | 22/06/2014 | 25/06/2014          | 05/07/2014                                                                          | 26/06/2014 | 31.8 | 190.4  | 17 <sup>h</sup> 06' |  |
|            |        |            |                     |                                                                                     | 27/06/2014 | 28.5 | 100.1  | 17 <sup>h</sup> 25' |  |
|            |        |            |                     |                                                                                     | 28/06/2014 | 26.8 | 110.7  | 18 <sup>h</sup> 20' |  |
|            |        |            |                     |                                                                                     | 29/06/2014 | 75.7 | 287.6  | 19 <sup>h</sup> 00' |  |
|            |        |            |                     |                                                                                     | 30/06/2014 | 42.0 | 180.3  | 21 <sup>h</sup> 29' |  |
|            |        |            |                     |                                                                                     | 01/07/2014 | 47.0 | 154.9  | 18 <sup>h</sup> 32' |  |
|            |        |            |                     |                                                                                     | 02/07/2014 | 33.5 | 141.0  | 17 <sup>h</sup> 45' |  |
|            |        |            |                     |                                                                                     | 03/07/2014 | 46.8 | 193.0  | 18 <sup>h</sup> 33' |  |
| 04/07/2014 | 49.4   | 282.3      | 18 <sup>h</sup> 13' |  |            |      |        |                     |                                                                                     |
| A12        | TA2247 | 22/06/2014 | 05/07/2014          | 07/07/2014                                                                          | 06/07/2014 | 25.0 | 77.9   | 20 <sup>h</sup> 38' |  |

For each bird, the individual code (Code), ring number (Ring), date of release (Release), date of homing after displacement (Homing), date of the GPS power off (GPS off), date of start of each spontaneous flight (Flight). For each spontaneous flight the maximal distance (km) reached from the colony (MD), the length (km) of the flight path (Length), and the duration of the journey (Duration) are reported. For each flight the identification colour of the track reported in Figure S1 is shown (Track).
